# Supplementary material for: Synthesis, structures, luminescent and molecular recognition properties of three new alkaline earth metal carboxyphosphonates with a 3D supramolecular structure
Source: Royal Society of Chemistry journal article supplement (doi:10.1039/c5nj00656b), 2015-01-01
Supplement: c5nj00656b1.pdf [file c5nj00656b1.pdf]

# Synthesis, structures, luminescent and molecular recognition properties of three new alkaline earth metal carboxyphosphonates with a 3D supramolecular structure

Hui Luo, Chao Ma, Cheng-Qi Jiao, Zhen-Gang Sun,\* Tong Sun, Ming-Xue Ma, Yan-Yu Zhu, Wen-Zhu Li, Mei-Ling Wang, and Xiao-Wen Zhang

## Supplementary Materials

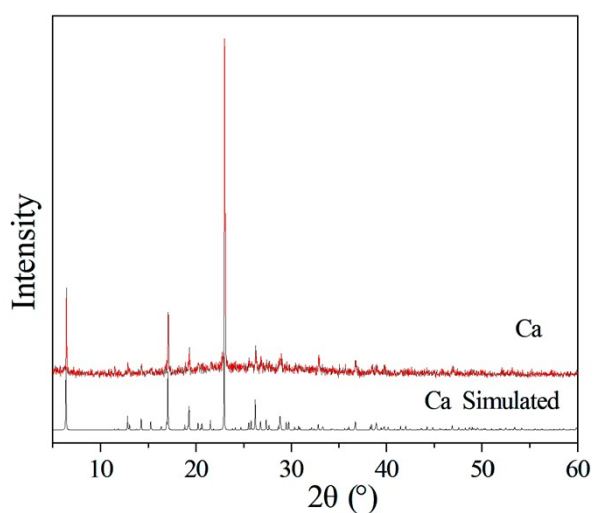

**Fig S1.** The simulated XRD pattern of compound **1** (down) and experimental powder XRD pattern of compound **1** (up)

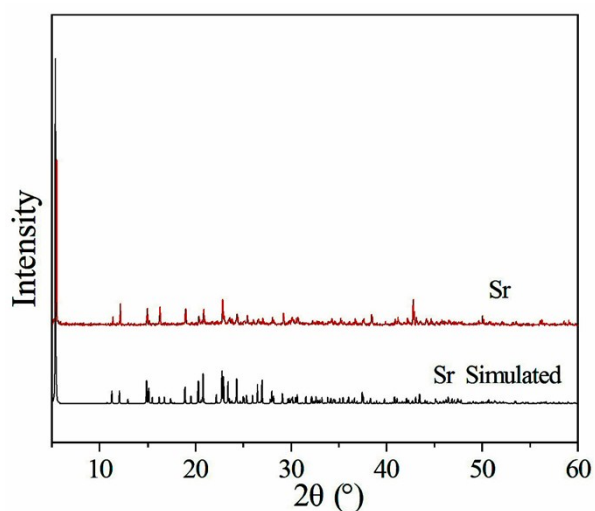

**Fig S2.** The simulated XRD pattern of compound **2** (down) and experimental powder XRD pattern of compound **2** (up)

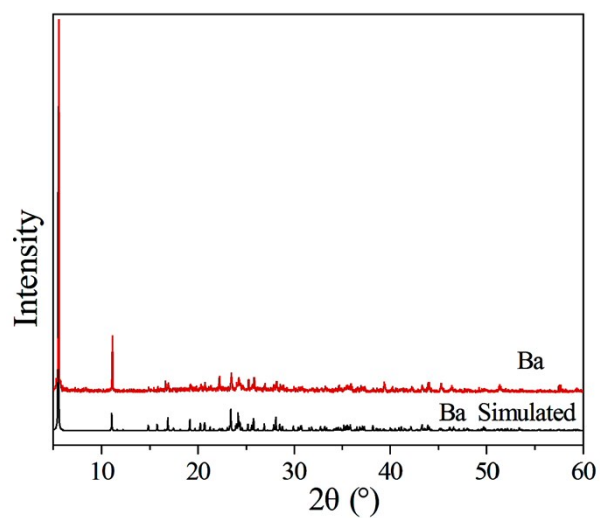

**Fig S3.** The simulated XRD pattern of compound **3** (down) and experimental powder XRD pattern of compound **3** (up)

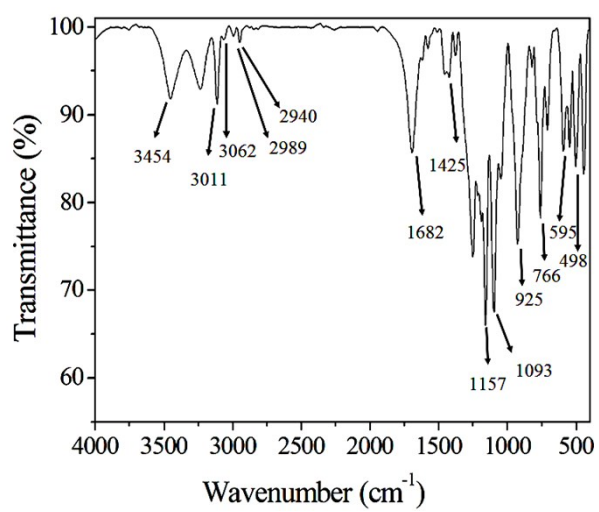

**Fig S4.** The IR spectrum of compound **1**.

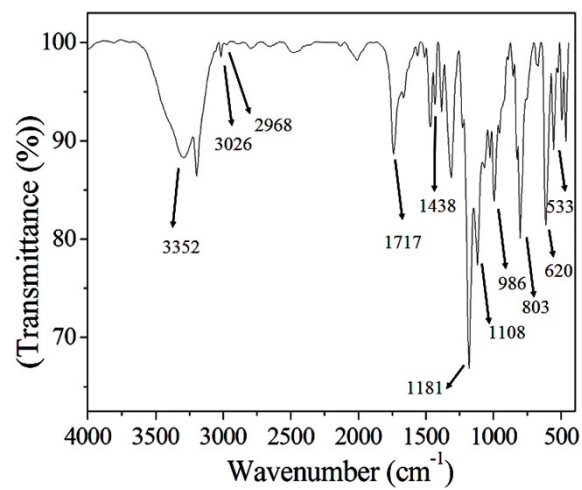

Fig S5. The IR spectrum of compound 2.

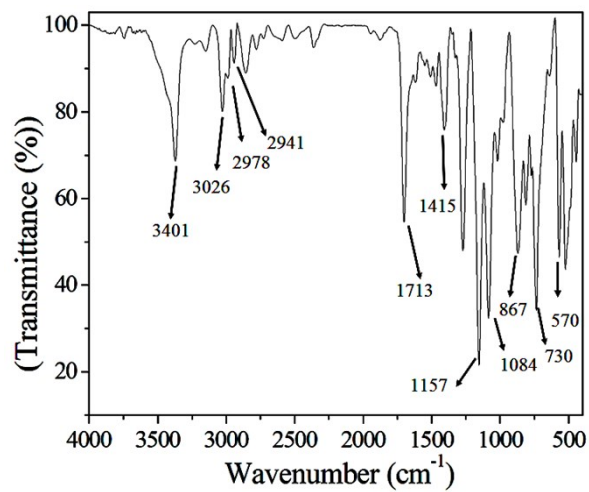

**Fig S6.** The IR spectrum of compound **3**.

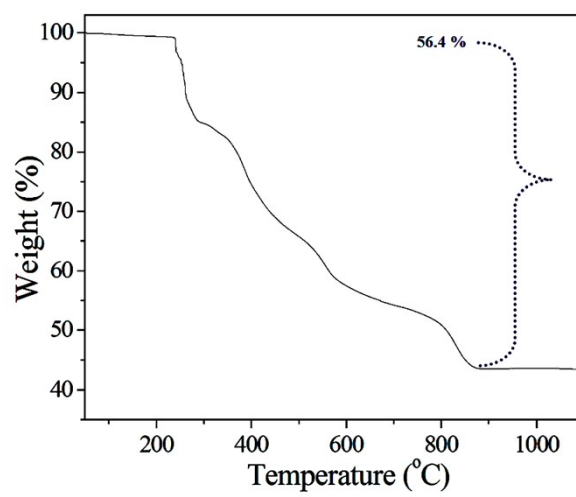

Fig S7. The TG curve of compound 1.

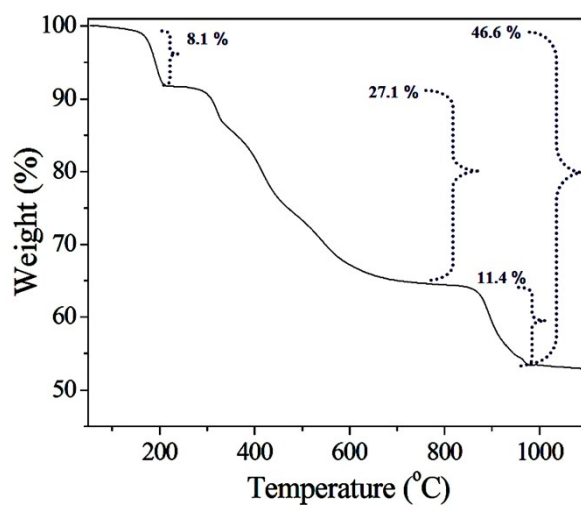

Fig S8. The TG curve of compound 2.

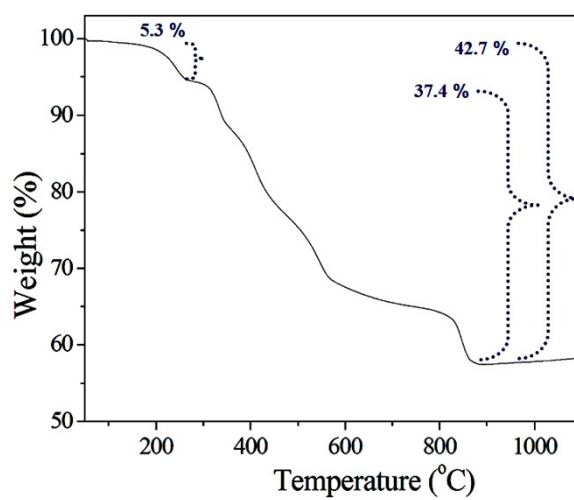

**Fig S9.** The TG curve of compound **3**.

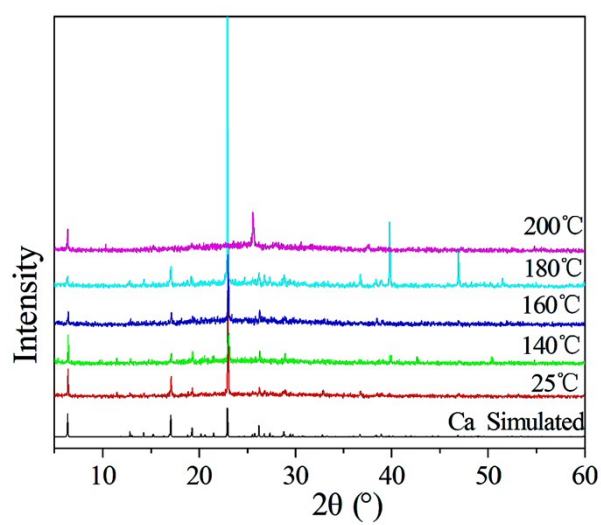

**Fig S10.** The PXR D patterns for compound **1** on heating from 25–200 °C.

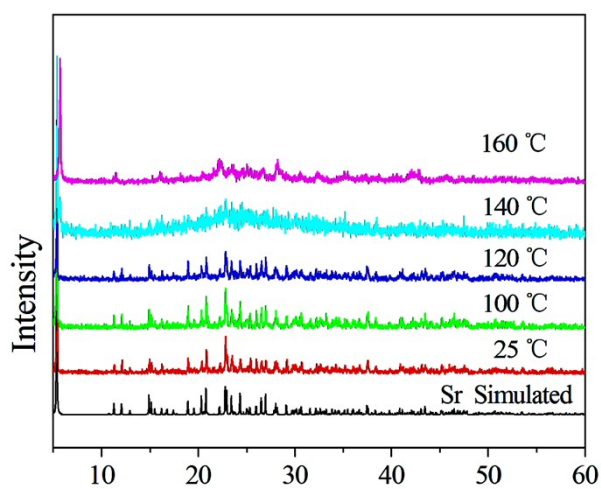

**Fig S11.** The PXRD patterns for compound **2** on heating from 25–160 °C.

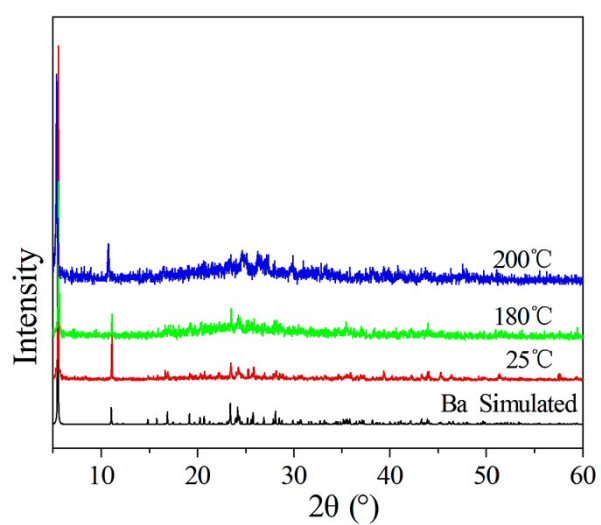

**Fig S12.** The PXRD patterns for compound **3** on heating from 25–200 °C.

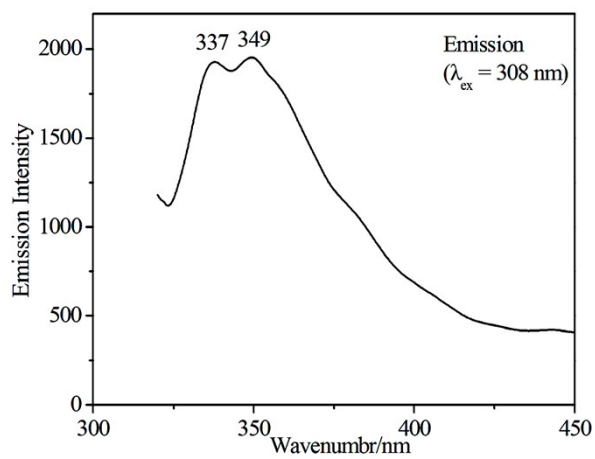

**Fig**  
spectrum of H<sub>5</sub>L at room

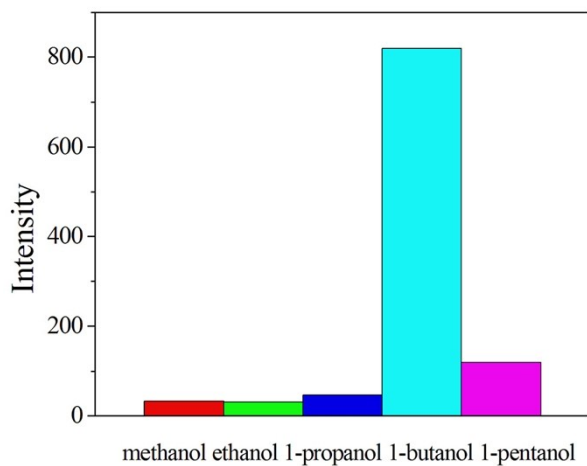

**S13.** Solid-state emission temperature.

**Fig S14.**  
alcohol solvents when excited

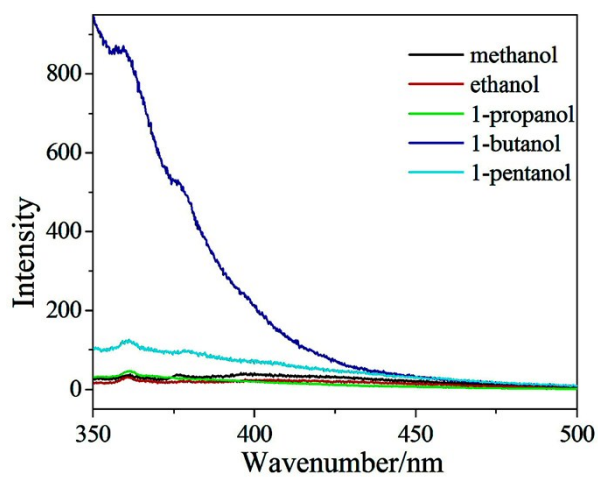

The emission spectra of  
at 325 nm.



**Fig S15.** The transition intensities of various alcohol solvents when excited at 325 nm.

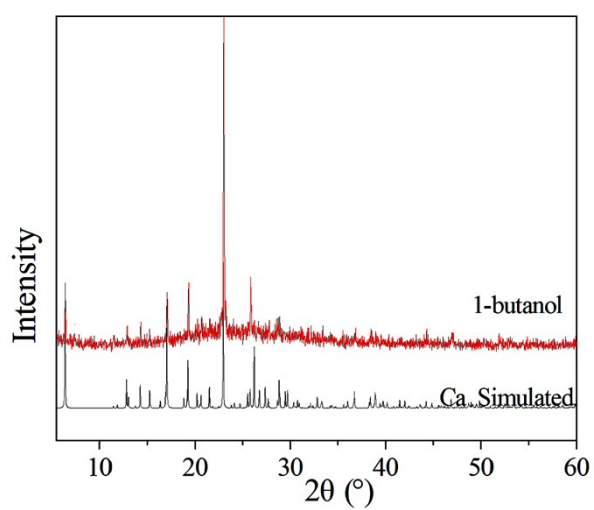

**Fig S16.** The simulated XRD pattern of compound **1** (down) and diffraction patterns obtained on compound **1** after the introduction of ethanol (up)

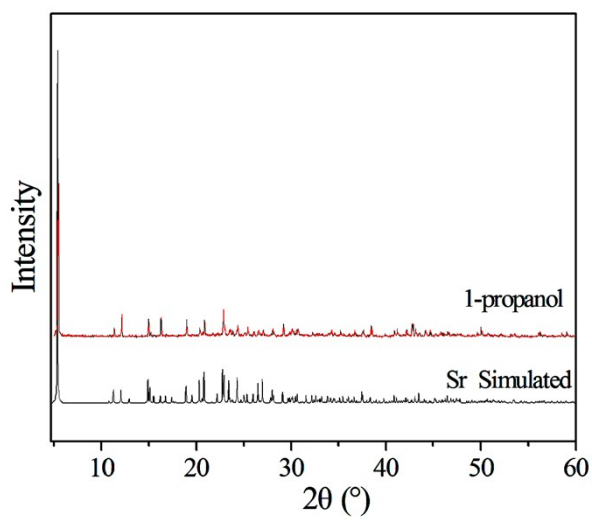

**Fig S17.** The simulated XRD pattern of compound **2** (down) and diffraction patterns obtained on compound **2** after the introduction of 1-propanol (up).

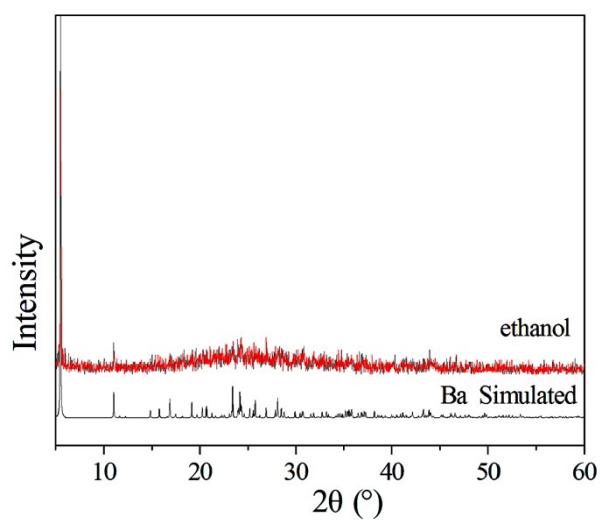

**Fig S18.** The simulated XRD pattern of compound **3** (down) and diffraction patterns obtained on compound **3** after the introduction of ethanol (up).

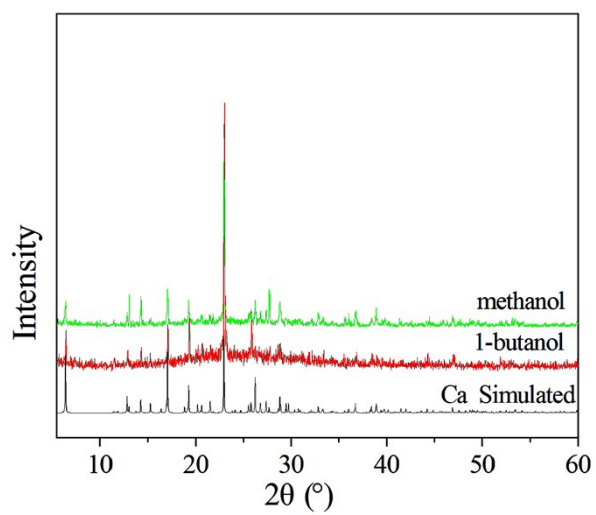

**Fig S19.** The simulated XRD pattern of compound **1** (down) and diffraction patterns obtained on compound **1** after the introduction of methanol and 1-butanol (up)

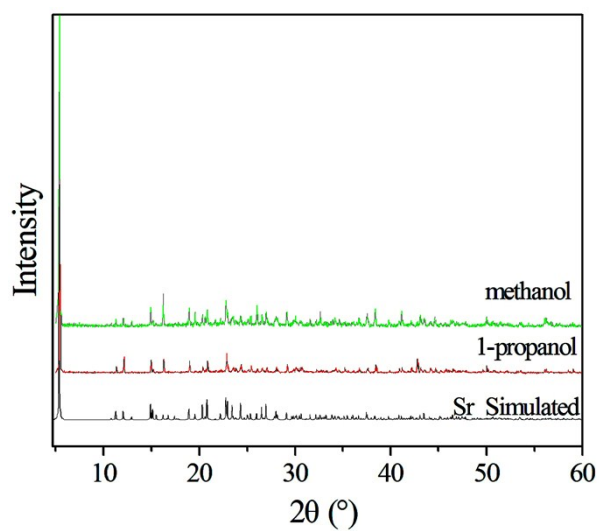

**Fig S20.** The simulated XRD pattern of compound **2** (down) and diffraction patterns obtained on compound **2** after the introduction of methanol and 1-propanol (up)

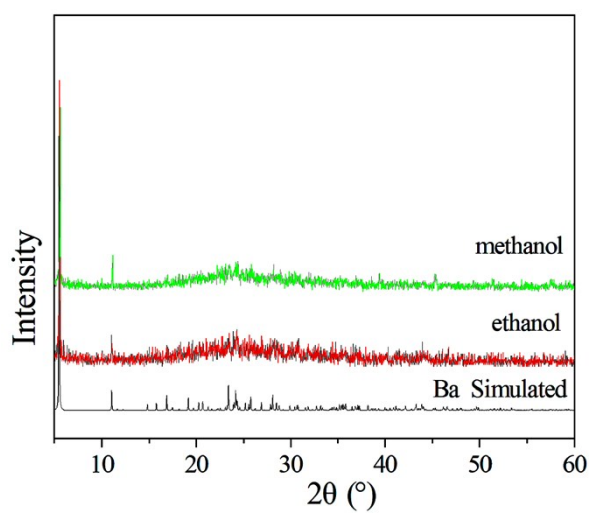

**Fig S21.** The simulated XRD pattern of compound **3** (down) and diffraction patterns obtained on compound **3** after the introduction of methanol and ethanol (up)

**Table S1** Selected Bond Lengths (Å) and Angles (°) for Compound **1**<sup>a</sup>

|                     |                  |                   |            |
|---------------------|------------------|-------------------|------------|
| Ca(1)–O(6)          | 2.2838(15)       | P(1)–C(1)         | 1.832(2)   |
| Ca(1)–O(3)#1        | 2.2850(16)       | P(2)–O(5)         | 1.5058(15) |
| Ca(1)–O(2)#2        | Ca(1)–2.3079(16) | P(2)–O(6)         | 1.5069(16) |
| O(5)#2              | 2.3406(14)       | P(2)–O(4)         | 1.5364(16) |
| Ca(1)–O(9)          | 2.4070(16)       | P(2)–C(2)         | 1.841(2)   |
| Ca(1)–O(7)#3        | 2.4109(17)       | O(2)–Ca(1)#4      | 2.3079(16) |
| P(1)–O(3)           | 1.4895(16)       | O(3)–Ca(1)#1      | 2.2850(16) |
| P(1)–O(2)           | 1.4956(16)       | O(5)–Ca(1)#4      | 2.2850(16) |
| P(1)–O(1)           | 1.5713(17)       | O(7)–Ca(1)#3      | 2.4109(17) |
| O(6)–Ca(1)–O(3)#1   | 90.29(6)         | O(9)–Ca(1)–O(7)#3 | 85.01(6)   |
| O(6)–Ca(1)–O(2)#2   | 88.14(6)         | O(3)–P(1)–O(2)    | 117.82(10) |
| O(3)#1–Ca(1)–O(2)#2 | 99.42(6)         | O(3)–P(1)–O(1)    | 110.55(10) |
| O(6)–Ca(1)–O(5)#2   | 175.85(6)        | O(2)–P(1)–O(1)    | 106.29(9)  |
| O(3)#1–Ca(1)–O(5)#2 | 88.16(6)         | O(3)–P(1)–C(1)    | 104.06(9)  |
| O(2)#2–Ca(1)–O(5)#2 | 88.32(6)         | O(2)–P(1)–C(1)    | 110.77(10) |
| O(6)–Ca(1)–O(9)     | 98.79(6)         | O(1)–P(1)–C(1)    | 106.58(10) |
| O(3)#1–Ca(1)–O(9)   | 87.43(6)         | O(5)–P(2)–O(6)    | 115.42(9)  |
| O(2)#2–Ca(1)–O(9)   | 170.27(6)        | O(5)–P(2)–O(4)    | 111.64(9)  |
| O(5)#2–Ca(1)–O(9)   | 84.98(6)         | O(6)–P(2)–O(4)    | 112.78(9)  |
| O(6)–Ca(1)–O(7)#3   | 92.99(6)         | O(5)–P(2)–C(2)    | 108.78(9)  |
| O(3)#1–Ca(1)–O(7)#3 | 172.14(7)        | O(6)–P(2)–C(2)    | 103.17(10) |
| O(2)#2–Ca(1)–O(7)#3 | 87.83(7)         | O(4)–P(2)–C(2)    | 103.95(9)  |
| O(5)#2–Ca(1)–O(7)#3 | 89.03(6)         |                   |            |

<sup>a</sup> Symmetry transformations used to generate equivalent atoms: #1  $-x + 2, -y + 1, -z + 1$ ; #2  $x - 1, y, z$ ; #3  $-x + 1, -y + 1, -z$ ; #4  $x + 1, y, z$

**Table S2** Selected Bond Lengths (Å) and Angles (°) for Compound **2<sup>a</sup>**

|                     |           |                         |            |
|---------------------|-----------|-------------------------|------------|
| Sr(1)–O(2)#1        | 2.550(3)  | P(1)–C(1)               | 1.842(4)   |
| Sr(1)–O(1)          | 2.558(2)  | P(2)–O(5)               | 1.504(3)   |
| Sr(1)–O(3)#2        | 2.575(2)  | P(2)–O(6)               | 1.507(3)   |
| Sr(1)–O(6)#3        | 2.596(3)  | P(2)–O(4)               | 1.564(3)   |
| Sr(1)–O(10)         | 2.600(3)  | P(2)–C(2)               | 1.8197(17) |
| Sr(1)–O(9)          | 2.629(3)  | O(2)–Sr(1)#1            | 2.551(3)   |
| Sr(1)–O(9)#4        | 2.632(3)  | O(3)–Sr(1)#5            | 2.575(2)   |
| P(1)–O(2)           | 1.511(3)  | O(6)–Sr(1)#6            | 2.596(3)   |
| P(1)–O(3)           | 1.521(3)  | O(9)–Sr(1)#4            | 2.632(3)   |
| P(1)–O(1)           | 1.528(3)  |                         |            |
| O(2)#1–Sr(1)–O(1)   | 123.50(8) | O(3)#2–Sr(1)–O(9)#4     | 76.34(8)   |
| O(2)#1–Sr(1)–O(3)#2 | 141.78(9) | O(10)–Sr(1)–O(9)#4      | 141.61(8)  |
| O(1)–Sr(1)–O(3)#2   | 88.06(8)  | O(6)#3–Sr(1)–O(9)#4     | 145.48(8)  |
| O(2)#1–Sr(1)–O(10)  | 71.60(9)  | O(9)–Sr(1)–O(9)#4 O(2)– | 73.44(9)   |
| O(1)–Sr(1)–O(10)    | 79.20(8)  | P(1)–O(3) O(2)–         | 114.59(15) |
| O(3)#2–Sr(1)–O(10)  | 141.82(9) | P(1)–O(1) O(3)–         | 110.10(15) |
| O(6)#3–Sr(1)–O(10)  | 70.24(8)  | P(1)–O(1) O(2)–         | 112.86(16) |
| O(2)#1–Sr(1)–O(6)#3 | 118.97(9) | P(1)–C(1) O(3)–         | 109.16(17) |
| O(1)–Sr(1)–O(6)#3   | 93.37(9)  | P(1)–C(1) O(1)–         | 103.02(15) |
| O(3)#2–Sr(1)–O(6)#3 | 74.84(8)  | P(1)–C(1) O(5)–         | 106.52(16) |
| O(2)#1–Sr(1)–O(9)   | 71.41(8)  | P(2)–O(6) O(5)–         | 116.89(15) |
| O(1)–Sr(1)–O(9)     | 164.36(8) | P(2)–O(4) O(6)–         | 111.75(15) |
| O(3)#2–Sr(1)–O(9)   | 76.35(8)  | P(2)–O(4) O(6)–         | 110.38(16) |
| O(10)–Sr(1)–O(9)    | 112.49(8) | P(2)–C(2) O(5)–         | 106.98(12) |
| O(6)#3–Sr(1)–O(9)   | 81.60(8)  | P(2)–C(2) O(4)–         | 104.48(13) |
| O(2)#1–Sr(1)–O(9)#4 | 75.25(9)  | P(2)–C(2)               | 105.42(12) |
| O(1)–Sr(1)–O(9)#4   | 104.26(8) |                         |            |

<sup>a</sup> Symmetry transformations used to generate equivalent atoms: #1  $x, y + 1, z + 1$ ; #2  $x + 1, y, z$ ; #3  $x, y + 1, z$ ; #4  $x + 1, y + 1, z + 1$ ; #5  $x - 1, y, z$ ; #6  $x, y + 1, z$

**Table S3** Selected Bond Lengths (Å) and Angles (°) for Compound **3<sup>a</sup>**

|                     |            |                     |            |
|---------------------|------------|---------------------|------------|
| Ba(1)–O(4)#1        | 2.733(6)   | P(1)–C(1)           | 1.814(9)   |
| Ba(1)–O(3)#1        | 2.781(6)   | P(2)–O(6)           | 1.556(6)   |
| Ba(1)–O(5)#2        | 2.804(6)   | P(2)–O(4)           | 1.504(6)   |
| Ba(1)–O(3)#3        | 2.876(6)   | P(2)–O(5)           | 1.507(6)   |
| Ba(1)–O(9)#4        | 2.880(6)   | P(2)–C(2)           | 1.849(9)   |
| Ba(1)–O(9)          | 2.911(6)   | O(1)–Ba(1)#6        | 3.053(7)   |
| Ba(1)–O(6)          | 2.956(6)   | O(2)–Ba(1)#7        | 3.110(6)   |
| Ba(1)–O(4)          | 3.003(6)   | O(3)–Ba(1)#1        | 2.781(6)   |
| Ba(1)–O(1)#3        | 3.053(7)   | O(3)–Ba(1)#6        | 2.876(6)   |
| Ba(1)–O(2)#5        | 3.110(6)   | O(4)–Ba(1)#1        | 2.733(6)   |
| P(1)–O(3)           | 1.494(6)   | O(5)–Ba(1)#4        | 2.804(6)   |
| P(1)–O(2)           | 1.508(6)   | O(9)–Ba(1)#2        | 2.880(6)   |
| P(1)–O(1)           | 1.566(6)   |                     |            |
| O(4)#1–Ba(1)–O(3)#1 | 75.54(19)  | O(5)–P(2)–O(6)      | 112.8(3)   |
| O(4)#1–Ba(1)–O(5)#2 | 83.46(18)  | O(5)–P(2)–C(2)      | 110.1(4)   |
| O(3)#1–Ba(1)–O(5)#2 | 148.05(18) | O(6)–P(2)–C(2)      | 100.9(4)   |
| O(4)#1–Ba(1)–O(3)#3 | 118.04(18) | O(4)–P(2)–C(2)      | 106.1(4)   |
| O(3)#1–Ba(1)–O(3)#3 | 63.2(2)    | O(4)#1–Ba(1)–O(4)   | 72.52(19)  |
| O(5)#2–Ba(1)–O(3)#3 | 108.35(17) | O(3)#1–Ba(1)–O(4)   | 127.58(17) |
| O(3)#3–Ba(1)–O(9)#4 | 77.43(18)  | O(5)#2–Ba(1)–O(4)   | 65.58(16)  |
| O(3)#1–Ba(1)–O(9)#4 | 67.50(17)  | O(9)#4–Ba(1)–O(4)   | 167.98(17) |
| O(5)#2–Ba(1)–O(9)#4 | 131.01(17) | O(3)#3–Ba(1)–O(4)   | 119.68(17) |
| O(4)#1–Ba(1)–O(9)#4 | 120.50(17) | O(9)–Ba(1)–O(4)     | 65.72(16)  |
| O(4)#1–Ba(1)–O(9)   | 69.15(18)  | O(6)–Ba(1)–O(4)     | 49.68(16)  |
| O(3)#1–Ba(1)–O(9)   | 84.58(17)  | O(4)#1–Ba(1)–O(1)#3 | 136.62(17) |
| O(5)#2–Ba(1)–O(9)   | 65.35(17)  | O(3)#1–Ba(1)–O(1)#3 | 112.74(17) |
| O(3)#3–Ba(1)–O(9)   | 140.9(2)   | O(5)#2–Ba(1)–O(1)#3 | 67.92(16)  |
| O(9)#4–Ba(1)–O(9)   | 63.09(17)  | O(3)#3–Ba(1)–O(1)#3 | 49.56(16)  |
| O(4)#1–Ba(1)–O(6)   | 120.58(17) | O(9)#4–Ba(1)–O(1)#3 | 145.89(17) |
| O(3)#1–Ba(1)–O(6)   | 127.06(17) | O(9)–Ba(1)–O(1)#3   | 69.48(17)  |
| O(5)#2–Ba(1)–O(6)   | 84.37(16)  | O(6)–Ba(1)–O(1)#3   | 89.32(16)  |
| O(3)#3–Ba(1)–O(6)   | 121.02(17) | O(4)–Ba(1)–O(1)#3   | 119.12(16) |
| O(9)–Ba(1)–O(6)     | 68.29(17)  | O(4)#1–Ba(1)–O(2)#5 | 139.88(17) |
| O(9)#4–Ba(1)–O(6)   | 147.63(16) | O(3)#1–Ba(1)–O(2)#5 | 71.85(17)  |
| O(3)–P(1)–O(2)      | 117.7(4)   | O(5)#2–Ba(1)–O(2)#5 | 135.48(17) |
| O(3)–P(1)–O(1)      | 109.0(4)   | O(3)#3–Ba(1)–O(2)#5 | 65.70(16)  |
| O(2)–P(1)–O(1)      | 111.8(3)   | O(9)#4–Ba(1)–O(2)#5 | 68.95(17)  |
| O(3)–P(1)–C(1)      | 104.2(4)   | O(9)–Ba(1)–O(2)#5   | 128.78(16) |
| O(2)–P(1)–C(1)      | 108.0(4)   | O(6)–Ba(1)–O(2)#5   | 66.15(15)  |
| O(1)–P(1)–C(1)      | 105.3(4)   | O(4)–Ba(1)–O(2)#5   | 78.68(16)  |
| O(4)–P(2)–O(5)      | 116.0(4)   | O(1)#3–Ba(1)–O(2)#5 | 110.63(15) |
| O(4)–P(2)–O(6)      | 109.8(3)   |                     |            |

<sup>a</sup> Symmetry transformations used to generate equivalent atoms: #1  $-x + 1, -y + 1, -z$ ; #2  $x - 1, y, z$ ; #3  $x, y + 1, z$ ; #4  $x + 1, y, z$ ; #5  $x + 1, y + 1, z$ ; #6  $x, y - 1, z$ ; #7  $x - 1, y - 1, z$
